# Supplementary material for: Challenges in the Diagnosis of Pelvic Fracture-Related Lower Urinary Tract Injury: A 13-Year Retrospective Analysis
Source: Research Square preprint supplement (doi:10.21203/rs.3.rs-5436238/v1), 2024-12-17
Supplement: Supplementary file 1 [file 076f4ab8feb92b1555f5e51b.docx]

Supplementary Table 1. Comparison of Demographic Characteristics Between Patients with and without Delayed LUTI Diagnosis

| **Variables** | **Delayed diagnosis (N=13)** | **Without delayed diagnosis (N=114)** | **p** |
| --- | --- | --- | --- |
| Age (years) a | 46 (25-68) | 36 (26-53) | 0.308* |
| Female, n (%) | 6 (46) | 24 (21) | 0.044† |
| BMI (kg/m2) a | 25.7 (22.0-29.6) | 23.8 (21.1-26.0) | 0.116* |
| Unstable hemodynamics at ED, n (%) | 7 (54) | 81 (71) | 0.203† |
| ISS a | 20 (14-36) | 26 (20-41) | 0.370* |
| LUTI diagnosis, n (%) |  |  | <0.001† |
| CT | 1 (8) | 56 (49) |  |
| RUG | 3 (23) | 36 (32) |  |
| Urgent laparotomy | 5 (39) | 7 (6) |  |
| Cystography | 4 (31) | 14 (12) |  |
| Cystoscopy | 0 (0) | 1 (1) |  |
| Injury site, n (%) |  |  | 0.545† |
| Bladder | 4 (31) | 47 (41) |  |
| Urethra | 9 (69) | 60 (53) |  |
| Both | 0 (0) | 7 (6) |  |
| Catheter placement at ED, n (%) |  |  | 0.007† |
| Urethral catheter insertion | 10 (77) | 66 (60) |  |
| SPC insertion | 0 (0) | 40 (35) |  |
| Both | 0 (0) | 2 (2) |  |
| Pelvic fixation, n (%) | 12 (92) | 73 (64) | 0.059† |
| Initial TAE, n (%) | 6 (46) | 58 (51) | 0.747† |
| Outcomes, n (%) |  |  |  |
| Urinary tract infection | 6 (46) | 42 (37) | 0.512† |
| Pelvic wound infection | 5 (39) | 27 (24) | 0.245† |
| Urethral stricture | 2 (18) | 29 (31) | 0.499† |
| Urinary incontinence | 3 (25) | 14 (15) | 0.413† |
| Mortality | 1 (8) | 13 (11) | 1† |

BMI = body mass index; ED = emergency department; ISS = Injury Severity Score;

APC= anteroposterior compression; LC= lateral compression; CT = computed tomography; RUG = retrograde urethrography; TAE= transcatheter arterial embolization; SPT = suprapubic catheter; TUR= transurethral resection; UTI = urinary tract infection.

a Median (25–75% interquartile range)

* Mann-Whitney U test

† Chi-square test
