# Supplementary material for: Challenges in the Diagnosis of Pelvic Fracture-Related Lower Urinary Tract Injury: A 13-Year Retrospective Analysis
Source: Research Square preprint supplement (doi:10.21203/rs.3.rs-5436238/v1), 2024-12-17
Supplement: Supplementary file 2 [file c8e578f234df9fcfd9371b64.docx]

Table 1. Characteristics of Enrolled Patients Diagnosed with Pelvic Fracture and Lower Urinary Tract Injuries (LUTI)

| **Variables** | **Patients with LUTI  (N=127)** |
| --- | --- |
| **Age (years) a** | 36 (26-55) |
| **Male, n (%)** | 97 (76) |
| **BMI (kg/m2) a** | 24 (21.6-26.2) |
| **Unstable hemodynamics at ED, n (%)** | 88 (69) |
| **ISS a** | 26 (20-39) |
| **Mechanism, n (%)** |  |
| MVC | 63 (50) |
| Fall | 21 (17) |
| Pedestrian vs automobile | 20 (16) |
| Crush | 23 (18) |
| **Pelvic fracture type, n (%)** |  |
| APC | 54 (43) |
| LC | 60 (47) |
| Non APC-I or non LC-I | 105 (83) |
| **LUTI diagnotic modality at ED, n (%)** |  |
| CT | 55 (43) |
| Retrograde urethrography | 32 (25) |
| Cystography | 11 (9) |
| Urgent laparotomy | 7 (6) |
| LUTI not diagnosed at ED, n (%) |  |
| Planned RUG or cystography | 9 (7) |
| Delayed diagnosis | 13 (10) |
| **LUTI site, n (%)** |  |
| Bladder | 69 (54) |
| Extraperitoneal bladder rupture | 36 (28) |
| Intraperitoneal bladder rupture | 22 (17) |
| Urethra | 51 (40) |
| Anterior urethra | 22 (17) |
| Posterior urethra | 29 (23) |
| Both | 7 (6) |
| **Intervention** |  |
| Urinary diversion at ED, n (%) |  |
| Foley catheter insertion | 75 (59) |
| SPC insertion | 40 (32) |
| Both | 2 (2) |
| Initial TAE, n (%) | 64 (50) |
| Pelvic fixation, n (%) | 85 (67) |
| **Outcomes, n (%):** |  |
| Urinary tract infection | 48 (44) |
| Pelvic wound infection | 32 (25) |
| Mortality | 14 (11) |

BMI = body mass index; MVC= motor vehicle collision; ED = emergency department; ISS = Injury Severity Score; APC= anteroposterior compression; LC= lateral compression; CT= computed tomography; RUG= retrograde urethrography; TAE= transcatheter arterial embolization; SPC= suprapubic catheter

a Median (25–75% interquartile range).

Table 2. Comparison of Demographic Characteristics Between Patients with Isolated Bladder and Urethral Injuries

| **Variables** | **Isolated bladder injury**  **(N=69)** | **Isolated urethral injury**  **(N=51)** | **p** |
| --- | --- | --- | --- |
| **Age (years) a** | 33 (26-55) | 37 (26-56) | 0.527* |
| **Male, n (%)** | 41 (59) | 50 (98) | <0.001† |
| **BMI (kg/m2) a** | 24.1 (21-25.7) | 23.9 (21.9-26.4) | 0.600* |
| **Unstable hemodynamics at ED, n (%)** | 46 (67) | 36 (71) | 0.648† |
| **ISS a** | 29 (20-41) | 20 (13-34) | 0.002* |
| **LUTI diagnostic modality at ED, n (%)** |  |  |  |
| CT | 40 (58) | 10 (20) |  |
| RUG | 1 (1) | 30 (59) |  |
| Cystography | 10 (14) | 1 (2) |  |
| Urgent laparotomy | 5 (7) | 1 (2) |  |
| Planned urologic study after admission | 5 (7) | 4 (8) |  |
| Delayed diagnosis | 8 (12) | 5 (10) |  |
| **Intervention** |  |  |  |
| Urinary diversion at ED |  |  | <0.001† |
| Urethral catheter insertion | 64 (93) | 7 (14) |  |
| SPC insertion | 2 (3) | 35 (69) |  |
| Both | 0 (0) | 2 (4) |  |
| TAE, n (%) | 32 (46) | 28 (55) | 0.356† |
| Pelvic fixation, n (%) | 50 (73) | 28 (55) | 0.046† |
| **Outcomes, n (%):** |  |  |  |
| Urinary tract infection | 21 (30) | 23 (45) | 0.099† |
| Pelvic wound infection | 16 (23) | 14 (28) | 0.594† |
| Mortality | 9 (13) | 5 (10) | 0.585† |

BMI = body mass index; ED = emergency department; ISS = Injury Severity Score

; APC= anteroposterior compression; LC= lateral compression; TAE = transcatheter arterial embolization; CT= computed tomography; RUG = retrograde urethrography; SPC= suprapubic tube

a Median (25–75% interquartile range)

* Mann-Whitney U test

† Chi-square test

Table 3. LUTI Patients Diagnosed by CT at Emergency Department

| **Variables** | **Diagnosed by CT at ED  (N=55)** |
| --- | --- |
| **Age (years) a** | 33 (25-52) |
| **Male, n (%)** | 39 (71) |
| **BMI (kg/m2) a** | 23.3 (21.0-24.7) |
| **Unstable hemodynamics at ED, n (%)** | 37 (67) |
| **ISS a** | 29 (20-41) |
| **Further urologic study after CT, n (%)** |  |
| RUG | 13 (24) |
| Cystography | 17 (31) |
| **Injury site, n (%)** |  |
| Bladder | 41 (75) |
| Urethra | 9 (16) |
| Both | 5 (9) |
| **Intervention** |  |
| Urinary diversion at ED |  |
| Urethral catheter insertion | 40 (73) |
| SPC insertion | 14 (26) |
| TAE, n (%) | 25 (46) |
| Pelvic fixation, n (%) | 33 (60) |
| **Following Intervention after CT without urological imaginng, n (%)** |  |
| Primary realignment of urethra | 1 (4) |
| Cystostomy under cystoscopy | 2 (8) |
| Bladder repair | 12 (48) |
| TUR for hemostasis | 1 (4) |
| **Outcomes, n (%)** |  |
| Urinary tract infection, n (%) | 17 (31) |
| Pelvic wound infection, n (%) | 7 (13) |

BMI = body mass index; ED = emergency department; ISS = Injury Severity Score;

APC= anteroposterior compression; LC= lateral compression; CT = computed tomography; RUG = retrograde urethrography; TAE= transcatheter arterial embolization; SPC = suprapubic catheter; TUR= transurethral resection; UTI = urinary tract infection.

a Median (25–75% interquartile range)

Table 4 Clinical Details, Characteristics, and Outcomes of Patients with Delayed LUTI Diagnosis

| **No.** | **Sex** | **Age** | **ISS** | **Injury site** | **Diagnosis modality** | **Time to dx (Day)** | **Initial successful Foley** | **Mortality** | **UTI** | **Pelvic wound infection** | **Erectile dysfunction** | **Urethral stricture** | **Urinary incontinence** |
| --- | --- | --- | --- | --- | --- | --- | --- | --- | --- | --- | --- | --- | --- |
| 1. | M | 46 | 13 | Urethra | RUG | 1 | Yes |  |  |  |  |  |  |
| 2. | M | 24 | 13 | Urethra | RUG | 12 | Yes |  |  |  |  | + |  |
| 3. | M | 77 | 43 | Urethra | RUG | 13 | Yes |  |  |  |  |  | + |
| 4. | M | 40 | 34 | Urethra | RUG | 4 | Yes |  |  | + |  |  |  |
| 5. | M | 21 | 34 | Urethra | OP | 7 | Yes |  | + | + | + | + | + |
| 6. | F | 26 | 14 | Bladder | CT | 1 | No |  | + |  |  |  |  |
| 7. | F | 58 | 41 | Bladder | Cystoscopy | 3 | Yes |  | + |  |  |  | + |
| 8. | F | 8 | 48 | Bladder | Cystography | 4 | Yes | + | + |  |  |  |  |
| 9. | M | 23 | 20 | Bladder | Cystography | 5 | Yes |  | + | + |  |  |  |
| 10. | F | 57 | 36 | Bladder | OP | 6 | Yes |  |  |  |  |  |  |
| 11. | F | 68 | 20 | Bladder | OP | 7 | Yes |  |  |  |  |  |  |
| 12. | M | 29 | 21 | Bladder | OP | 5 | Yes |  | + | + |  |  | + |
| 13. | F | 67 | 36 | Bladder | OP | 12 | Yes |  |  | + |  |  |  |

ISS = Injury Severity Score; Time to dx: Time to diagnosis; RUG = retrograde urethrography; OP = operation; CT = computed tomography; UTI = urinary tract infection
